# Supplementary material for: RADIOISOTOPIC SCANNING OF THE LIVER IN LYMPHOGRANULOMATOSIS.
Source: Royal Society of Chemistry journal article supplement (doi:10.1039/d1nr03984a), 1971-01-01
Supplement: d1nr03984a1.pdf [file d1nr03984a1.pdf]

## **An electrical conductive and ferromagnetic submicron-structure manganese mono-boride with high Vickers hardness**

*Shuailing Ma<sup>1,3</sup>, Robert Farla<sup>3</sup>, Kuo Bao<sup>\*1</sup>, Akhil Tayal<sup>3</sup>, Yongsheng Zhao<sup>1</sup>, Qiang Tao<sup>1</sup>, Xigui Yang<sup>4</sup>, Teng Ma<sup>1</sup>,  
Pinwen Zhu<sup>1</sup>, Tian Cui<sup>\*2,1</sup>*

*1. Synergetic Extreme Condition High-Pressure Science Center, State Key Laboratory of Superhard Materials,  
College of Physics, Jilin University, Changchun, 130012, People's Republic of China.*

*2. Institute of High-Pressure Physics, School of Physical Science and Technology, Ningbo University, Ningbo,  
315211, China*

*3. Deutsches Elektronen-Synchrotron DESY, Notkestrasse. 85, 22607, Hamburg, Germany*

*4. Henan Key Laboratory of Diamond Optoelectronic Materials and Devices, Key Laboratory of Material Physics,  
Mistry of Education, School of Physics, Zhengzhou University, Zhengzhou, 450052, China*

E-mail: [kuobao@jlu.edu.cn](mailto:kuobao@jlu.edu.cn)

[cuitian@nbu.edu.cn](mailto:cuitian@nbu.edu.cn)

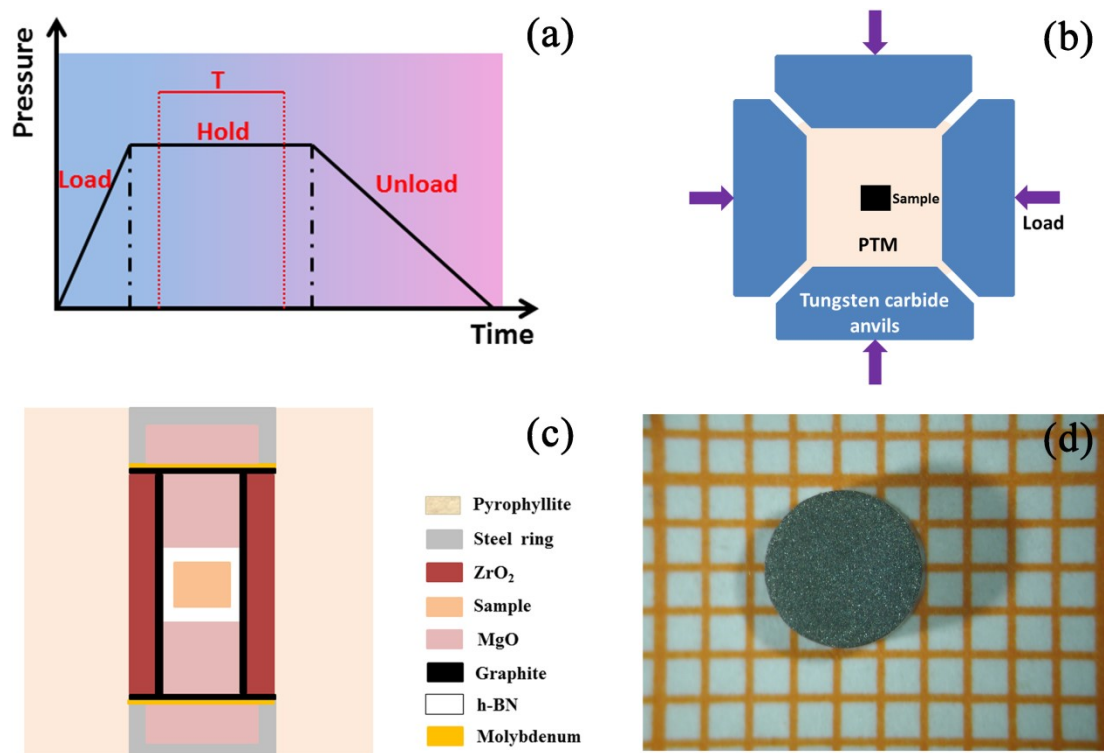

**Figure S1.** (a) The high pressure and high temperature (HPHT) experiment profile of typical HPHT experiment. (b) The cavity structure diagram of cubic high pressure experiment. (c) The sketch of cubic high pressure assembly for our HPHT experiments. (d) The optical images of the synthesized sample.

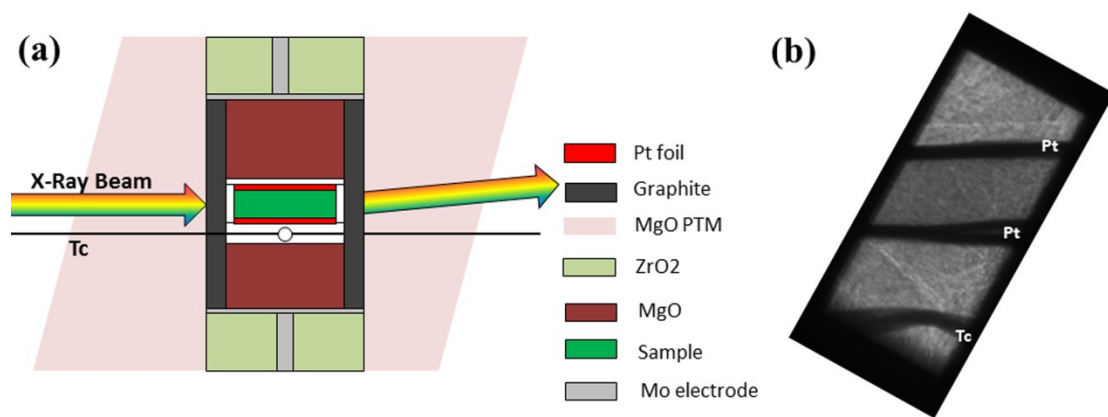

**Figure S2.** (a) The sketch of the high pressure assembly for high pressure and high temperature synchrotron experiment. (b) The tomography images of the assembly under about 5.0 GPa.

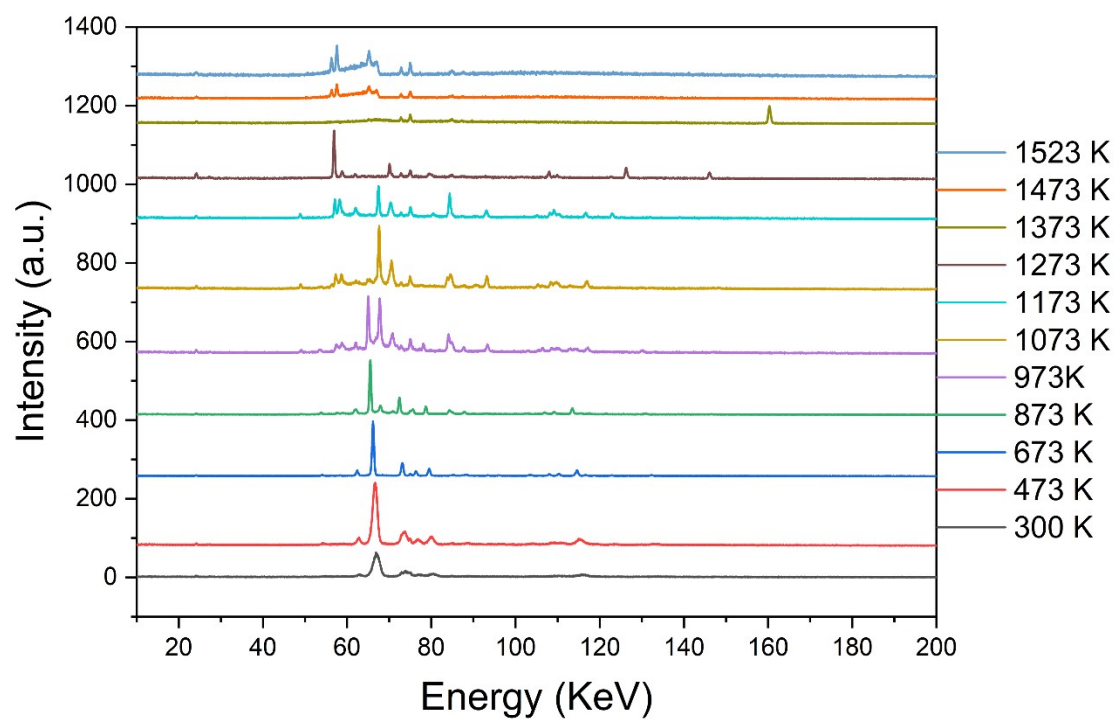

**Figure S3.** The in-situ energy dispersive X-ray diffraction spectra (EDXRD) of Mn:B=1:1 under 5 GPa with different temperature.

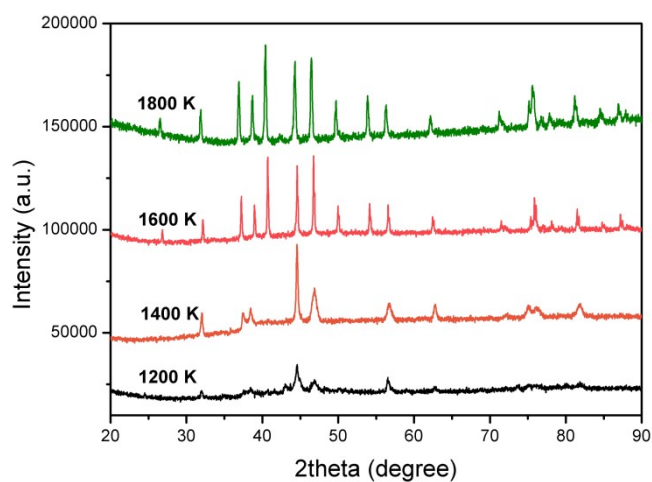

**Figure S4.** The x-ray diffractions of the recovered sample that synthesized at different temperature and pressure of 5 GPa.

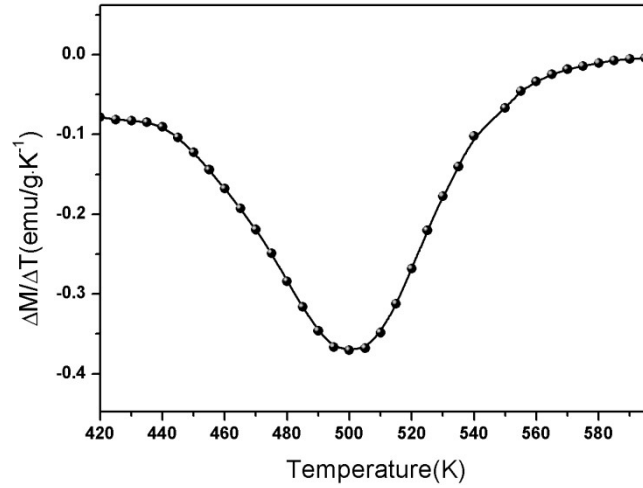

**Figure S5.** The derivative of magnetic susceptibility around the transition temperature of  $\alpha$ -MnB.

**Table 1.** The synthesis conditions, phase composition and the measured properties.

| Run Number | Conditions                        | Phase            | Hardness | Magnetic | Measurement          |
|------------|-----------------------------------|------------------|----------|----------|----------------------|
| SKL-C-885  | 5.0 GPa, 1200 K,<br>20min         | $\alpha$ -MnB    |          |          |                      |
| SKL-C-886  | 5.0 GPa, 1400 K,<br>20min         | $\alpha$ -MnB    | 16.7 GPa | FM       | TG-DTA<br>XPS<br>SEM |
| SKL-C-887  | 5.0 GPa, 1600 K,<br>20min         | $\beta$ -MnB     | 15.7 GPa | FM       |                      |
| SKL-C-888  | 5.0 GPa, 1800 K,<br>20min         | $\beta$ -MnB     |          |          |                      |
| HH372BL    | 5.0 GPa, 300 K-1523K<br>With beam | $\alpha$ -MnB    |          |          |                      |
| HH319      | 3.0 GPa, 1273 K,<br>20min         | $\alpha$ -MnB    |          |          | XAS                  |
| HH322      | 3.0 GPa, 1173 K,<br>20min         | $\alpha$ -MnB+Mn |          |          |                      |
| HH323      | 3.0 GPa, 1073 K,<br>20min         | $\alpha$ -MnB+Mn |          |          |                      |
